# Supplementary material
Source: PubMed Central journal article supplement (PMC4032065)
Supplement: NIHMS576200-supplement-01.pdf [file NIHMS576200-supplement-01.pdf]

# Supplementary Material

for

## Uptake and transfection efficiency of PEGylated cationic liposome–DNA complexes with and without RGD-tagging

Ramsey N. Majzoub<sup>a,b,c</sup>, Chia-Ling Chan<sup>a,b,c,d,e</sup>, Kai K. Ewert<sup>a,b,c</sup>, Bruno F. B. Silva<sup>a,b,c,f</sup>, Keng S. Liang<sup>e,g</sup>, Erica L. Jacovetty<sup>h</sup>, Bridget Carragher<sup>h</sup>, Clinton S. Potter<sup>h</sup>, Cyrus R. Safinya<sup>a,b,c,\*</sup>

<sup>a</sup> Department of Physics, University of California, Santa Barbara, California 93106, USA

<sup>b</sup> Department of Materials, University of California, Santa Barbara, California 93106, USA

<sup>c</sup> Molecular, Cellular, and Developmental Biology Department, University of California, Santa Barbara, California 93106, USA

<sup>d</sup> Institute of Physics, Academia Sinica, Taipei 11529, Taiwan

<sup>e</sup> National Synchrotron Radiation Research Center, Hsinchu 30076, Taiwan

<sup>f</sup> Division of Physical Chemistry, Centre for Chemistry and Chemical Engineering, Lund University, SE-221 00 Lund, Sweden

<sup>g</sup> Department of Electrophysics, National Chiao-Tung University, Hsinchu 30010, Taiwan

<sup>h</sup> National Resource for Automated Molecular Microscopy, Department of Integrative Structural and Computational Biology, The Scripps Research Institute, 10550 North Torrey Pines Road, La Jolla, California 92037, USA

\* Corresponding Author. Email Address: [safinya@mrl.ucsb.edu](mailto:safinya@mrl.ucsb.edu)

### Table of Contents:

|                                                                         |    |
|-------------------------------------------------------------------------|----|
| <b>Intracellular Motion of CL–DNA NPs</b>                               | S2 |
| <b>Fig. S1.</b> Intracellular motion of RGD-tagged CL–DNA nanoparticles | S3 |
| <b>Fig. S2.</b> Chemical structures of the lipids used in this work.    | S4 |

## **Intracellular Motion of CL–DNA NPs**

For single particle tracking studies of intracellular motion, live cells were incubated with fluorescently labeled RGD-tagged CL–DNA NPs at high membrane charge density and imaged 2 h after incubation (Fig. S1). For analysis of active transport, cells were transfected with GFP-tubulin before incubation with the CL–DNA NPs, allowing visualization of their cytoskeletal microtubule network. Particle tracking was performed with a custom routine in Matlab that was written using algorithms from [1].

Imaging and analysis of particle trajectories revealed two types of non-Brownian motion, both of which are indicative of endosomal entrapment of particles.

### **Evidence of active transport**

Fig. S1 A,B shows still frames and the trajectory for an example of an intracellular particle undergoing active transport. The particle moved rapidly along a trajectory which is colocalized with GFP-labeled microtubules. Additional evidence for active transport comes from the double-logarithmic plot of mean square displacement against time (Fig. S1E): the observed slope (the exponent  $\alpha$  in  $\langle \Delta R^2 \rangle = (D \delta t)^\alpha$ ) is much larger than 1, the value expected for Brownian motion. Motor protein-mediated transport along microtubules is facilitated through specific interactions, suggesting that CL–DNA NPs undergoing active transport are enclosed within intact endosomes.

### **Evidence of confined diffusion**

Fig. S1 C,D shows an example of an intracellular particle undergoing confined diffusion. The still frames in Fig. S1D show a small bright particle that is moving within a diffusely fluorescent circular area with  $R \approx 1 \mu\text{m}$ . The bright fluorescent particle's trajectory remains within this diffuse fluorescent spot for the entirety of its motion (Fig. S1C). The low value for the exponent  $\alpha$  (Fig. S1E; see above for definition of  $\alpha$ ) determined for the particle's motion is consistent with this observation, implying that the particle is confined within a finite volume. The boundary of the volume is labeled with fluorescent lipid (thus the diffuse fluorescence), suggesting that the particle is enclosed within a membrane-bound organelle and not the molecularly crowded cytoplasm or mesh-like cytoskeletal network. It is likely that collision of the CL–DNA complex with the confining endosomal membrane results in lipid exchange and thus fluorescent labeling of the endosomal membrane.

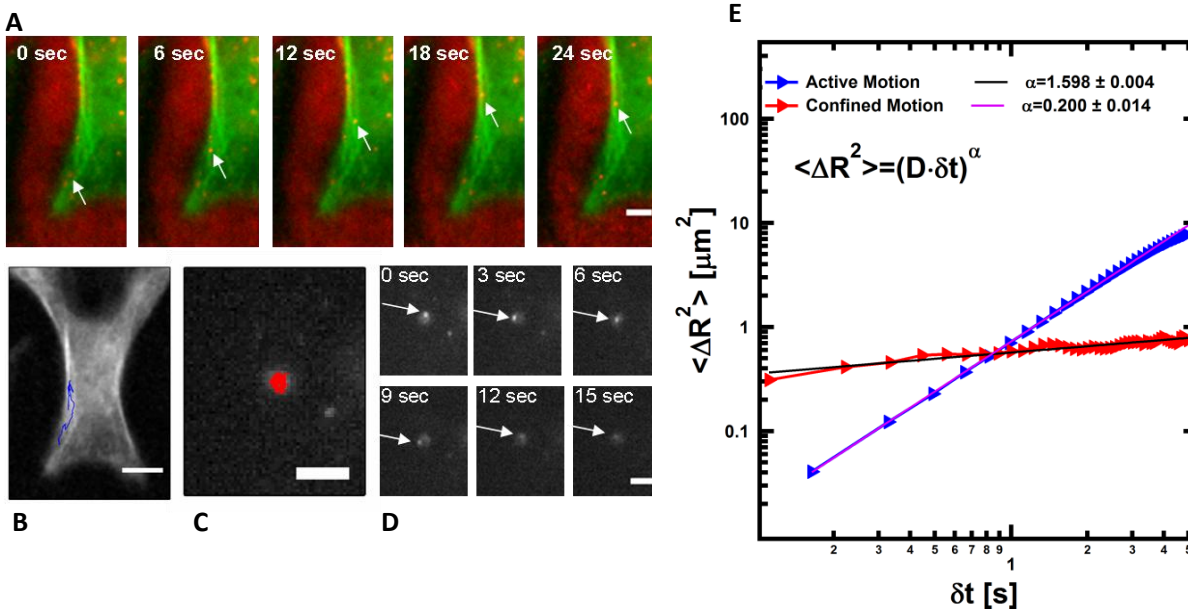

**Fig. S1.** Intracellular motion of RGD-tagged CL–DNA nanoparticles (DOTAP/DOPC/RGD-PEG2K-lipid = 80/10/10 mol/mol/mol). (A) Still frames showing fluorescently labeled CL–DNA nanoparticles within a GFP–tubulin expressing fibroblast. The white arrow marks a nanoparticle undergoing active transport. (B) The trajectory of the particle, as determined by particle tracking, shows colocalization with GFP-labeled microtubules. (C, D) Trajectory and still frames for a fluorescently labeled nanoparticle undergoing confined Brownian motion. The particle is confined within a diffusely fluorescent spot as evident from the colocalization of the particle’s trajectory and the diffuse spot (C). (E) Log-log plots of mean square displacement against time for the particles from parts (A) and (C). In both cases, the slope ( $\alpha$ ) deviates strongly from  $\alpha=1$ , the value expected for Brownian motion.

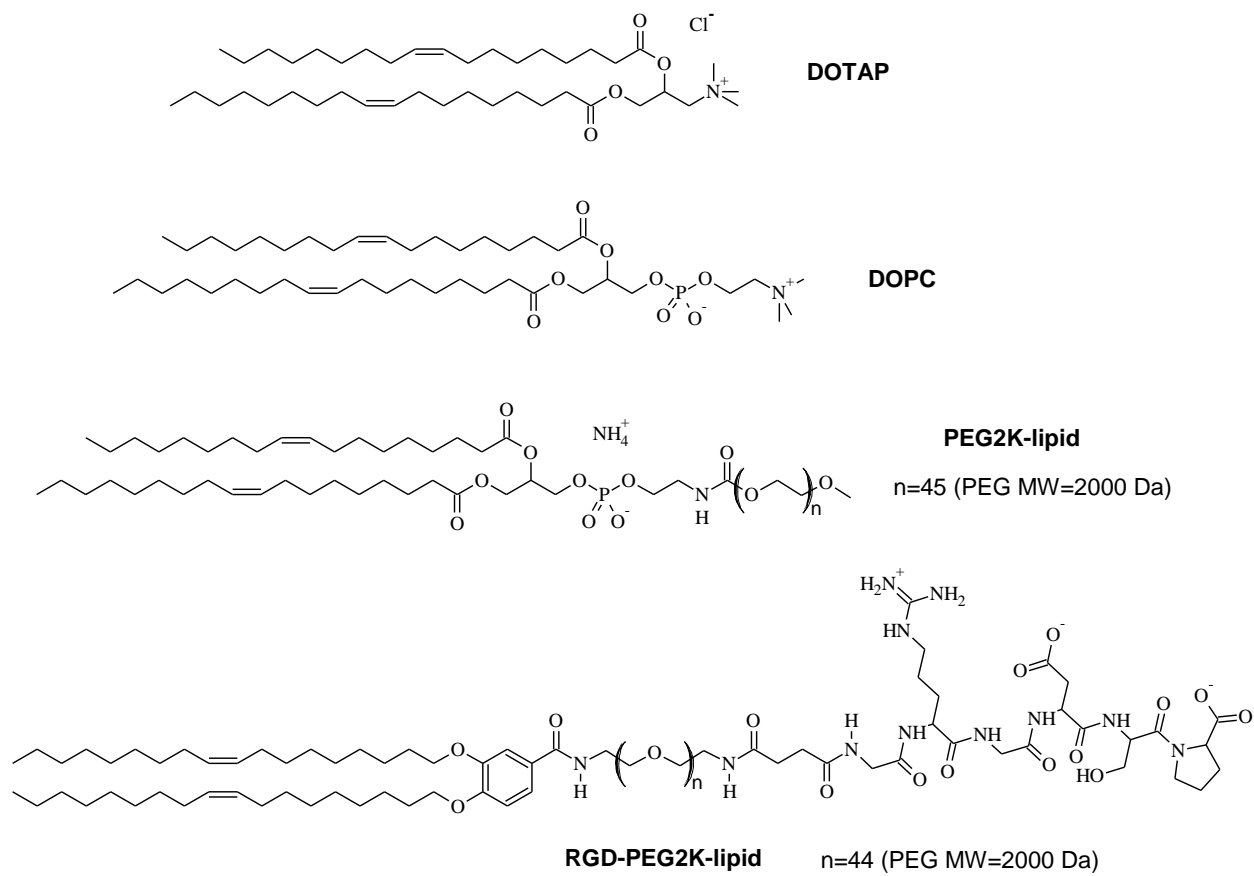

**Fig. S2.** Chemical structures of the lipids used in this work.

## References

- 1 Crocker JC, Grier DG. Methods of Digital Video Microscopy for Colloidal Studies. *J Colloid Interface Sci* 1996;179:298–310.
